# Supplementary material for: PD-1 Blockade Expands Intratumoral Memory T Cells
Source: Oxford University Press journal article supplement (doi:10.1158/2326-6066.cir-15-0210), 2016-01-19
Supplement: 23266066cir150210-sup-154531_1_supp_3214886_nxbly7.docx [file 23266066cir150210-sup-154531_1_supp_3214886_nxbly7.docx]

| **Fluorochorme** | **Panel 1** | **Panel 2** | **Panel 3** | **Panel 4** |
| --- | --- | --- | --- | --- |
| eFluor 450/BV451 | CD19  (HIB19**) | CD45RA  (HI100*/**) | CD45RA  (HI100*/**) | CD45RA  (HI100*/**) |
| PO/BV 510 | - | CD4 (S3.5***/OKT-4**) | CD4  (S3.5***/OKT-4**) | CD4 (S3.5***/OKT-4**) |
| eFluor605/  BV 605 | CD45  (HI-30*) | CD8  (RPA-T8*/**) | CD8  (RPA-T8*/**) | CD8  (RPA-T8*/**) |
| eFluor/  BV 650 | CD3  (OKT-3*/**) | CD3  (OKT-3*/**) | CD3  (OKT-3*/**) | CD3  (OKT-3*/**) |
| FITC | CD56  (B159★) | CD57  (NK1★) | CD28  (CD28.2★) | CD45RO  (UCHL1*) |
| PE | CD14  (TüK4) | CD45RO  (UCHL1*) | CD122  (Mikβ-3★) | CD28  (CD28.2★) |
| 7AAD  PC5 | 7AAD | 7AAD/  CD16 (3G8**)/  CD19 (HIB19**)/ | 7AAD/  CD16 (3G8**)/  CD19 (HIB19**)/  CD45RO (UCHL1★) | 7AAD/  CD16 (3G8**)/  CD19 (HIB19**)/ |
| ECD | HLA-DR  (Immu357) | CD62L  (DRG56) | CD62L  (DRG56) | CD62L  (DRG56) |
| APC/  Ax 647 | CD127  (hIL-7R-M21★) | PD1  (MIH4*) | CD127  (hIL-7R-M21★) | CD127  (hIL-7R-M21★) |
| Ax 700 | - | CD27  (M-T271★) | CD27  (M-T271★) | CD27  (M-T271★) |
| APC-Cy7/  APC-eF780 | CD25  (M-A251★) | CCR7  (3D12*) | CCR7  (3D12*) | CCR7  (3D12*) |
| PE-Cy7 | CD4  (SK3★) | CD95  (DX2★) | CD95  (DX2★) | CD95  (DX2★) |

*Affimetrix (eBioscience); **Biolegend; ***Life Technologies; Beckman Coulter; ★BDbioscience; BV=Brilliant Violet; PO= Pacific Orange; Ax=Alexa Fluor; ECD=PE-TexasRed; FTIC= Fluorescein isothiocyanate; PE= Phycoerythrin; APC= Allophycocyanin. PC5=Phycoerythrin Cyanine 5
